# Supplementary material for: circCHST15 is a novel prognostic biomarker that promotes clear cell renal cell carcinoma cell proliferation and metastasis through the miR-125a-5p/EIF4EBP1 axis
Source: Springer Nature journal article supplement (doi:10.1186/s12943-021-01449-w), 2021-12-01

A

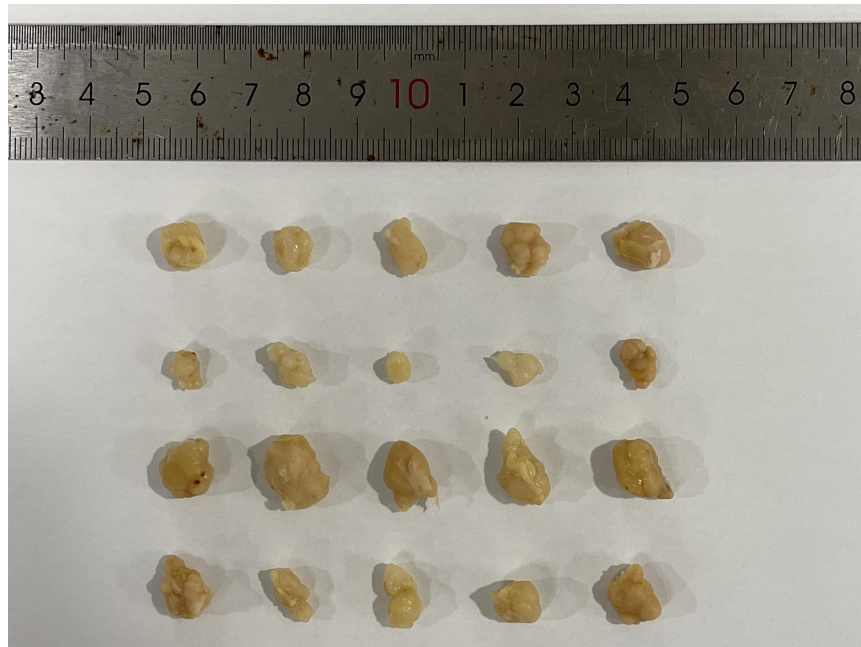

B

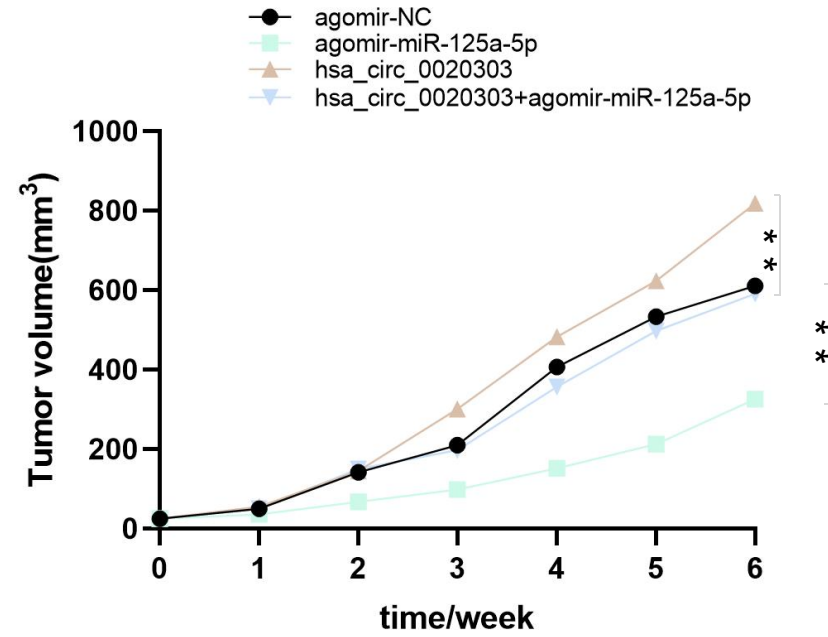

C

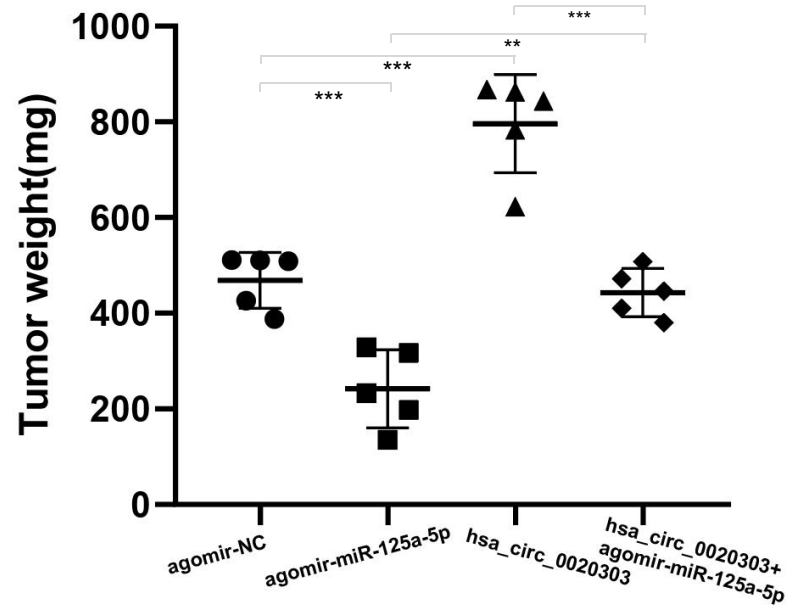

D

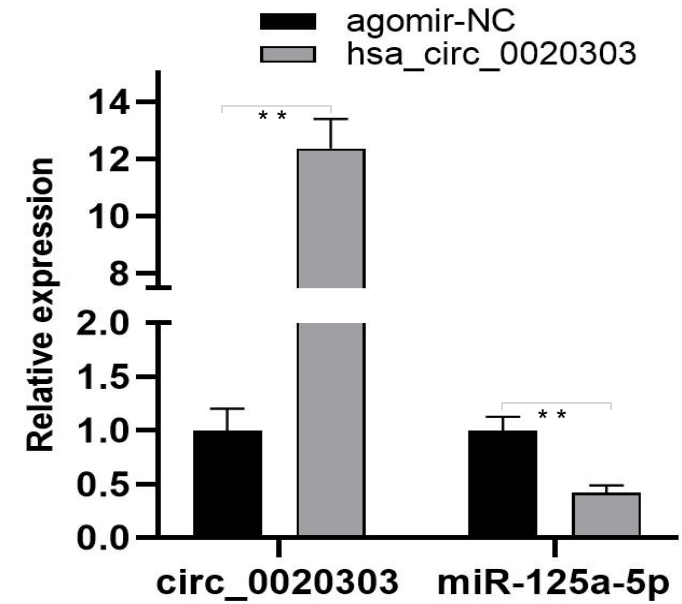

Supplement: MOESM8 [file 19967680]
